# Supplementary material for: Cytotoxic and Immunomodulatory Potential Activity of Physalis peruviana Fruit Extracts on Cervical Cancer (HeLa) and Fibroblast (L929) Cells
Source: PubMed Central journal article supplement — J Evid Based Complementary Altern Med. 2017 Jul 18;22(4):777–87. doi: 10.1177/2156587217718751 (PMC5871299; doi:10.1177/2156587217718751), 2017-07-18
Supplement: Supplementary_material1.pdf [file Supplementary_material1.pdf]

## Supplementary material

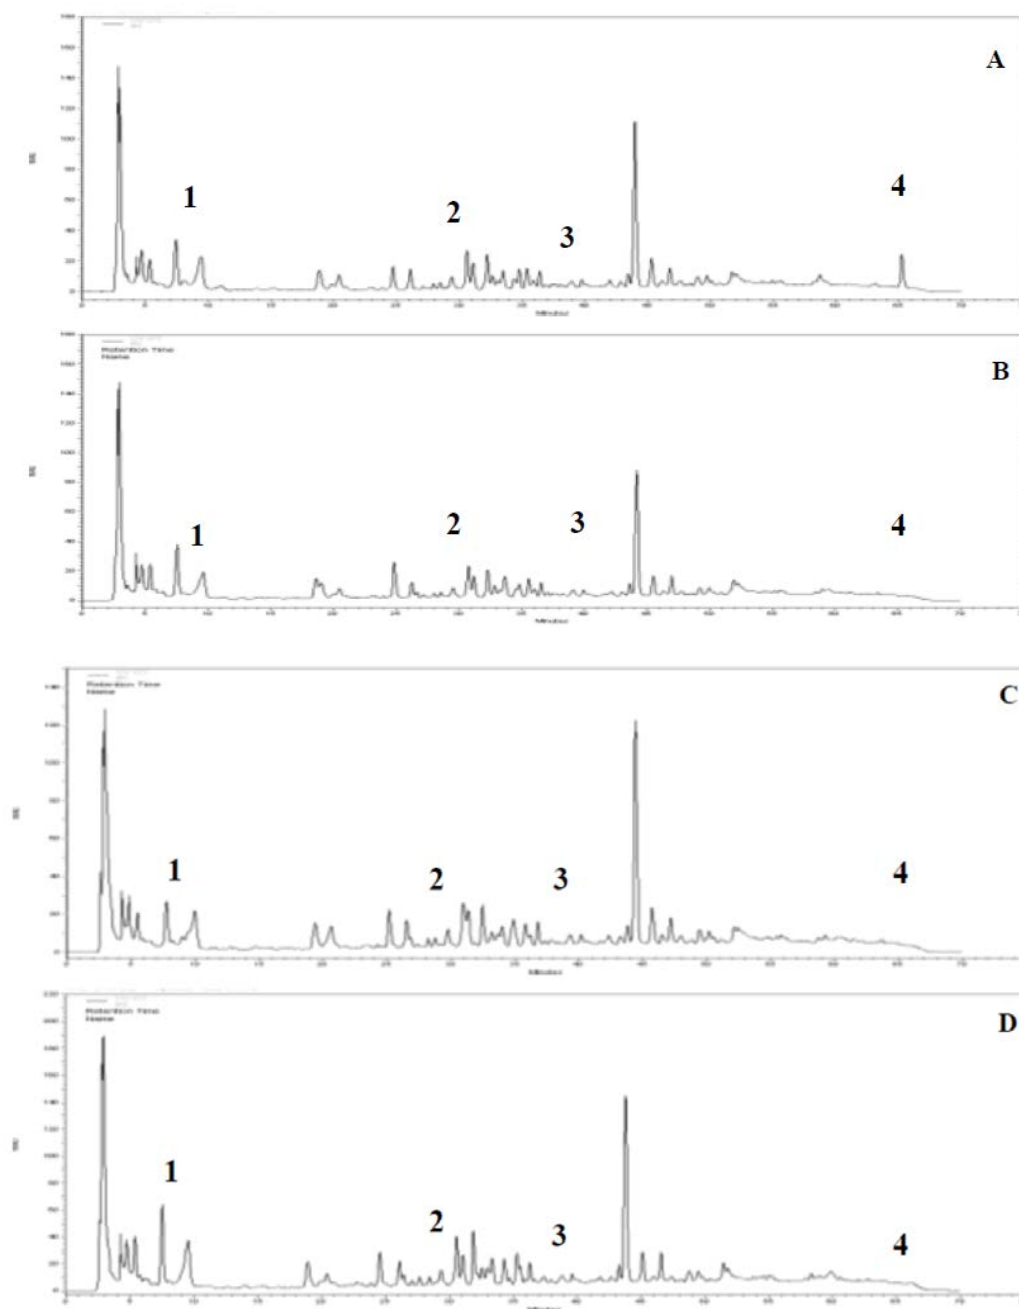

**Figure 1.** Chromatogram RP-HPLC at 280 nm of *Physalis peruviana* extracts A: IC1, B: IC2, C: EC2, D: EC1. Identified picks corresponds to: 1- Gallic acid, 2- Catechin, 3- Epicatechin, 4 Quercetin.

**Table 1.** Cytotoxicity of extracts against L929 and HeLa cell lines.

| Sample     | L929                      |                                    | HeLa                      |                                    |
|------------|---------------------------|------------------------------------|---------------------------|------------------------------------|
|            | IC50 ( $\mu\text{g/mL}$ ) | Pearson Coefficient ( $P < 0.05$ ) | IC50 ( $\mu\text{g/mL}$ ) | Pearson Coefficient ( $P < 0.05$ ) |
| IC2        | 66.62 $\pm$ 2.67 b        | 0.9490                             | 60.48 $\pm$ 3.28 a        | 0.9123                             |
| EC2        | 75.48 $\pm$ 3.53 ab       | 0.9578                             | 108.1 $\pm$ 3.10 b        | 0.9316                             |
| IC1        | 83.23 $\pm$ 3.36 a        | 0.9553                             | 100.1 $\pm$ 4.45 b        | 0.9175                             |
| EC1        | 67.32 $\pm$ 2.17 b        | 0.9739                             | 115.5 $\pm$ 22.34 b       | 0.9185                             |
| Paclitaxel | 5.368 $\pm$ 1.23 c        | 0.9044                             | 1.287 $\pm$ 0.06 c        | 0.9886                             |

HeLa, Human cervical cancer cell line, L929, Murine fibroblast cell line. All the data are the mean ( $n = 3$ )  $\pm$  standard deviation. The different letters indicate a significant difference of each compound between the extracts (Tukey  $P < .05$ ). IC2, Isopropanol extract from crop 1, IC1, Isopropanol extract from crop 2, EC2, Ethanol extract from crop 2, EC1, Ethanol extract from crop 1.

**Table 3.** Linear correlation coefficients among composition, antioxidant and cytotoxic capacity.

|                       | TP     | FRAP   | DPPH   | TC     | GA     | CA     | EP     | QT     | EC <sub>50</sub> | IC <sub>50H</sub> |
|-----------------------|--------|--------|--------|--------|--------|--------|--------|--------|------------------|-------------------|
| FRAP                  | 0.918* |        |        |        |        |        |        |        |                  |                   |
| DPPH                  | 0.734  | 0.925* |        |        |        |        |        |        |                  |                   |
| Carotenes             | -0.646 | -0.466 | -0.441 |        |        |        |        |        |                  |                   |
| Gallic Acid           | 0.588  | 0.86   | 0.934  | -0.095 |        |        |        |        |                  |                   |
| Catechin              | 0.872  | 0.993* | 0.934* | -0.367 | 0.908  |        |        |        |                  |                   |
| Epicatechin           | -0.085 | -0.291 | -0.199 | -0.699 | -0.517 | -0.384 |        |        |                  |                   |
| Quercetin             | 0.577  | 0.851  | 0.91   | -0.04  | 0.998* | 0.903  | -0.575 |        |                  |                   |
| EC <sub>50</sub> DPPH | -0.895 | -0.893 | -0.672 | 0.238  | -0.688 | -0.892 | 0.515  | -0.707 |                  |                   |
| IC <sub>50</sub> HeLa | -0.726 | -0.423 | -0.22  | 0.88   | 0.081  | -0.316 | -0.529 | 0.111  | 0.412            |                   |
| IC <sub>50</sub> L929 | 0.394  | 0.637  | 0.582  | 0.385  | 0.815  | 0.716  | -0.912 | 0.854  | -0.724           | 0.327             |

Pearson correlation coefficients between different variables studied. TP: total polyphenols; TC: total carotenes; GA: Gallic Acid; CA: Catechin; EP: Epicatechin; QT: Quercetin; EC<sub>50</sub>, EC<sub>50</sub> DPPH; IC<sub>50H</sub>, IC<sub>50</sub> HeLa. \*( $P < .05$ ).
